# Supplementary material
Source: ML conference proceedings conference paper supplement (https://openaccess.thecvf.com/content/ICCV2021/html/Wang_RDI-Net_Relational_Dynamic_ICCV_2021_paper.html)
Supplement: Supplementary file 1 [file Wang_RDI-Net_Relational_Dynamic_ICCV_2021_supplemental.pdf]

# RDI-Net: Relational Dynamic Inference Networks

## Supplementary Material

In this Supplementary Material, we provide several detailed experiments and illustrations. First, we provide more ablation studies as discussed in Section 4.3 of the manuscript. Second, we provide detailed results of our method on CIFAR-10/100 and ImageNet as discussed in Section 4.2 of the manuscript. Finally, we provide the concrete number of the comparisons in Figure 6 of the manuscript.

### A. Additional Studies

#### A.1. More Validation of Our Proposals

We provide more ablation studies of our proposals based on ResNet-32 and ResNet-110 in Table A. USW: Uniform Sampling Warm-up; SRM: Sample Relation Module. The first row refers to using routers without router feature fusion.

Table A. More ablations on CIFAR-10 and CIFAR-100.

| Backbones  | Methods |                    |     | CIFAR-10 |              | CIFAR-100 |              |
|------------|---------|--------------------|-----|----------|--------------|-----------|--------------|
|            | USW     | Relational Routers | SRM | GFLOPs   | Accuracy (%) | GFLOPs    | Accuracy (%) |
| ResNet-110 | —       | —                  | —   | 0.30     | 93.21        | 0.29      | 70.32        |
|            | ✓       | —                  | —   | 0.28     | 93.52        | 0.27      | 70.81        |
|            | ✓       | ✓                  | —   | 0.31     | 94.57        | 0.30      | 73.71        |
|            | ✓       | ✓                  | ✓   | 0.25     | 95.06        | 0.26      | 74.11        |
| ResNet-32  | —       | —                  | —   | 0.09     | 91.55        | 0.10      | 67.42        |
|            | ✓       | —                  | —   | 0.09     | 91.92        | 0.11      | 68.76        |
|            | ✓       | ✓                  | —   | 0.10     | 92.51        | 0.12      | 70.12        |
|            | ✓       | ✓                  | ✓   | 0.09     | 92.98        | 0.12      | 70.54        |

As illustrated in Table A, we present the improvement on CIFAR-10 and CIFAR-100 brought by our proposed USW (Uniform Sampling Warm-up), relational routers, and SRM (Sample Relation Module). The experiments show the effectiveness of each module on both CIFAR-10 and CIFAR-100 based on ResNet-32 and ResNet-110, respectively.

#### A.2. Comparison with other fusion methods.

We employ different router feature fusion methods in our relational routers, including: Average Pooling, Max Pooling, LSTM, and Graph Convolution. For LSTM, we follow the settings in SkipNet, which uses a share LSTM module for all routers. As shown in Table B, the GCN achieves a better performance in accuracy-cost trade-off.

Table B. Comparison of the router feature fusion method on CIFAR-10 with ResNet-110. GCN is used in our method.

| Methods      | Average Pooling | Max Pooling | LSTM  | GCN          |
|--------------|-----------------|-------------|-------|--------------|
| GFLOPs       | 0.31            | 0.32        | 0.18  | 0.25         |
| Accuracy (%) | 93.81           | 88.06       | 93.41 | <b>95.06</b> |

### A.3. Methods to Measure the Distance between Samples

We employ different methods to measure the similarity of samples, including: K-Means, Structural Similarity [R1], and Histogram Similarity [R2] on CIFAR-10. For K-Means, we use an extra well-trained model for feature extraction. Differently, Structural Similarity and Histogram Similarity utilize statistical information without an extra model. Then, we introduce the Kendall rank correlation coefficient [R3], *i.e.*, Kendall’s  $\tau$ . The Kendall’s  $\tau$  is computed as follows

$$\tau = \frac{P - Q}{P + Q}, \tau \in [-1, 1], \tag{i}$$

where  $P$  is the number of pairs that are concordant (in the same order in both rankings) and  $Q$  denotes the number of pairs that are discordant (in the reverse order). As shown in Table C, the best method to obtain the similarity between samples is H-Sim. When employing the unsupervised clustering method, K-Means, it only gets a result of relatively low performance compared with statistical methods. In terms of S-Sim, it achieves 94.76% performance with 0.07 Kendall rank correlation coefficient. In RDI-Net, we take H-Sim as the metric of correlation of the SRM module, which achieves the best performance and better correlation between executing paths and samples.

Table C. Comparison of different measurement methods for similarity of samples on CIFAR-10 with ResNet-110. The Kendall’s  $\tau$  is calculated between path similarity and the sample similarity in each batch. Note that the  $\tau > 0$  can be considered as a high value, which means more than half of the rankings are consistent.

| Methods          | K-Means | Structural Similarity | Histogram Similarity |
|------------------|---------|-----------------------|----------------------|
| Kendall’s $\tau$ | 0.06    | 0.07                  | 0.11                 |
| Accuracy (%)     | 90.71   | 94.76                 | 95.06                |

[R1] Zhou Wang, Alan C Bovik, Hamid R Sheikh, and Eero P Simoncelli. Image quality assessment: from error visibility to structural similarity. In *IEEE Trans. Image Process.*, 2004.

[R2] Rafael C Gonzales and Richard E Woods. In *Digital image processing.*, 2002.

[R3] Maurice G Kendall. A new measure of rank correlation. *957 Biometrika*, 30(1/2):81–93., 1938.

## B. Detailed Results of RDI-Net under Different Executing Rates

As discussed in Fig.5 in the manuscript, the detailed results of RDI-Net on CIFAR-10/100 and ImageNet under different executing rates  $t$  is shown in Table D, Table E, and Table F.

### B.1. CIFAR-10

Table D. Results on CIFAR-10 based on ResNets-110. The Rate refers to the target executing rate ( $t$ ).

| CIFAR-10   |       |              |        |
|------------|-------|--------------|--------|
| Methods    | Rates | Accuracy (%) | GFLOPs |
| ResNet-110 | —     | 93.60        | 0.50   |
| RDI-Net110 | 0.4   | 92.98        | 0.09   |
| RDI-Net110 | 0.5   | 93.97        | 0.16   |
| RDI-Net110 | 0.6   | 95.06        | 0.25   |
| RDI-Net110 | 0.8   | 95.12        | 0.39   |

### B.2. CIFAR-100

Table E. Results on CIFAR-100 based on ResNets-110. The Rate refers to the target executing rate ( $t$ ).

| CIFAR-100  |       |              |        |
|------------|-------|--------------|--------|
| Methods    | Rates | Accuracy (%) | GFLOPs |
| ResNet-110 | —     | 71.20        | 0.50   |
| RDI-Net110 | 0.2   | 71.22        | 0.11   |
| RDI-Net110 | 0.4   | 73.23        | 0.20   |
| RDI-Net110 | 0.6   | 74.04        | 0.26   |
| RDI-Net110 | 0.8   | 74.30        | 0.36   |

### B.3. ImageNet

Table F. The performance of our method on ImageNet. The Rate refers to the target executing rate ( $t$ ).

| ImageNet   |            |       |        |              |
|------------|------------|-------|--------|--------------|
| Methods    | Backbones  | Rates | GFLOPs | Accuracy (%) |
| ResNet-50  | —          | —     | 7.72   | 75.30        |
| RDI-Net50  | ResNet-50  | 0.6   | 4.96   | 75.28        |
| RDI-Net50  | ResNet-50  | 0.7   | 6.02   | 76.47        |
| RDI-Net50  | ResNet-50  | 0.8   | 6.68   | 76.89        |
| RDI-Net50  | ResNet-50  | 0.9   | 7.60   | 77.01        |
| ResNet-101 | —          | —     | 15.26  | 76.40        |
| RDI-Net101 | ResNet-101 | 0.5   | 8.12   | 77.27        |
| RDI-Net101 | ResNet-101 | 0.7   | 11.14  | 77.68        |

## C. Detailed Results in Performance Comparison

### C.1. CIFAR-10

Table G. The concrete number of performance comparison on CIFAR-10 as discussed in Fig.6.a in the manuscript.

| Comparison with SOTAs on CIFAR-10 |            |        |              |
|-----------------------------------|------------|--------|--------------|
| Methods                           | Backbone   | GFLOPs | Accuracy (%) |
| <i>Baselines</i>                  |            |        |              |
| ResNet-110                        | —          | 0.50   | 93.60        |
| ResNet-32                         | —          | 0.14   | 92.40        |
| <i>Dynamic inference</i>          |            |        |              |
| SkipNet                           | ResNet-110 | 0.09   | 92.38        |
| BlockDrop                         | ResNet-110 | 0.17   | 93.60        |
| Conv-AIG                          | ResNet-110 | 0.41   | 94.24        |
| CoDiNet                           | ResNet-110 | 0.29   | 94.47        |
| CoDiNet (light)                   | ResNet-110 | 0.10   | 92.45        |
| <i>Early prediction</i>           |            |        |              |
| IamNN                             | ResNet-101 | 1.10   | 94.60        |
| DG-Net                            | ResNet-101 | 3.20   | 93.99        |
| DG-Net (light)                    | ResNet-101 | 2.22   | 91.99        |
| DDI                               | ResNet-74  | 0.14   | 93.88        |
| RDI-Net (light)                   | ResNet-32  | 0.09   | 92.98        |
| RDI-Net                           | ResNet-110 | 0.25   | <b>95.06</b> |

### C.2. ImageNet

Table H. The concrete number of performance comparison on ImageNet as discussed in Fig.6.c in the manuscript.

| Comparison with SOTAs on ImageNet |              |        |              |
|-----------------------------------|--------------|--------|--------------|
| Methods                           | Backbone     | GFLOPs | Accuracy (%) |
| <i>Baselines</i>                  |              |        |              |
| ResNet-50                         | —            | 7.72   | 75.30        |
| ResNet-101                        | —            | 15.26  | 76.40        |
| <i>Dynamic inference</i>          |              |        |              |
| Conv-AIG                          | ResNet-50    | 6.12   | 76.18        |
| SkipNet                           | ResNet-101   | 7.22   | 75.22        |
| CoDiNet                           | ResNet-50    | 6.24   | 76.43        |
| DG-Net                            | ResNet-101   | 4.40   | 74.70        |
| DR-ResNet                         | ResNets      | 6.24   | 76.48        |
| <i>Early prediction</i>           |              |        |              |
| DDI                               | DenseNet-201 | 7.00   | 76.50        |
| MSDN                              | DenseNets    | 4.60   | 74.24        |
| RA-Net                            | DenseNets    | 4.80   | 75.10        |
| <i>Ours</i>                       |              |        |              |
| RDI-Net50                         | ResNet-50    | 6.02   | 76.47        |
| RDI-Net101                        | ResNet-101   | 11.14  | <b>77.68</b> |
